# Supplementary material
Source: PubMed Central journal article supplement (PMC4925261)

**figure 1a**

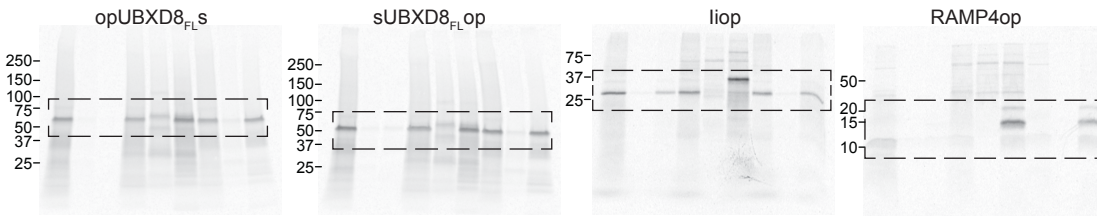

**figure 1c**

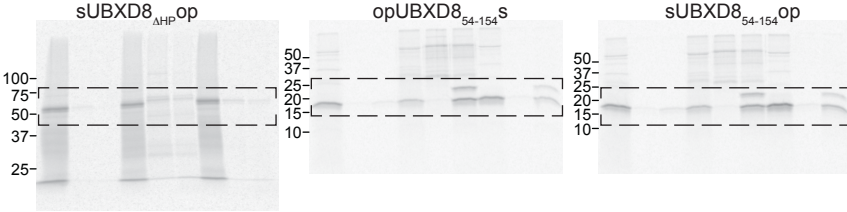

**figure 1e**

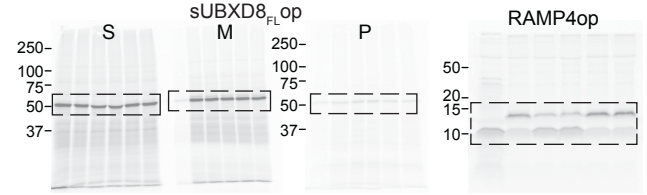

**figure 1f**

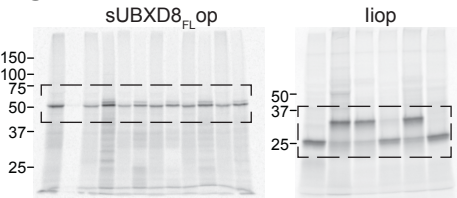

**figure 1g**

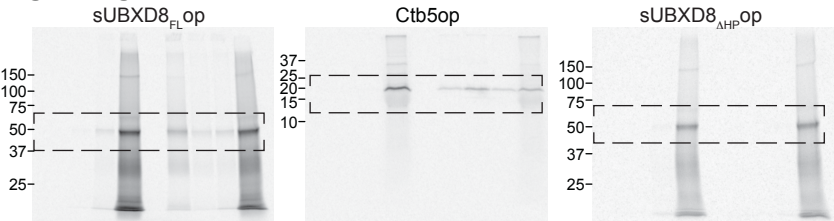

**figure 3a**

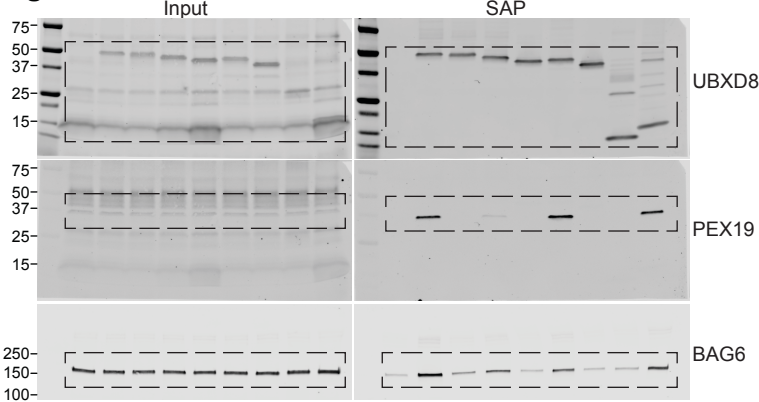

**figure 3c**

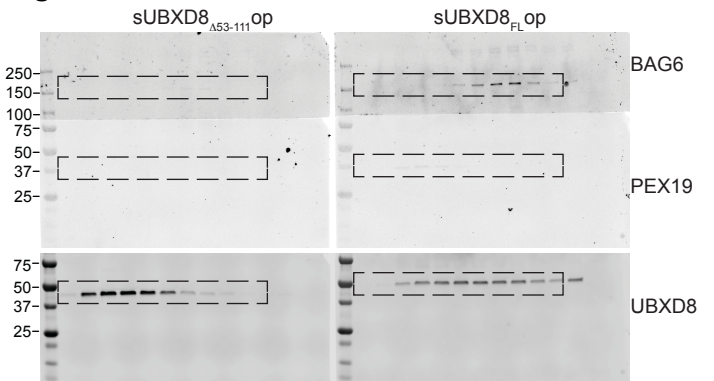

**figure 3d**

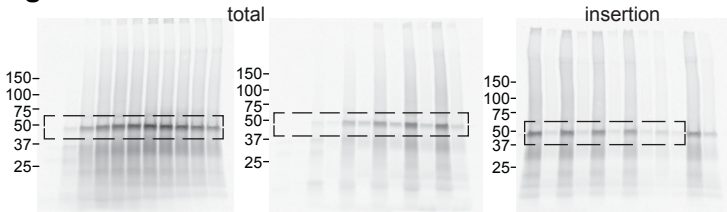

**figure 5b**

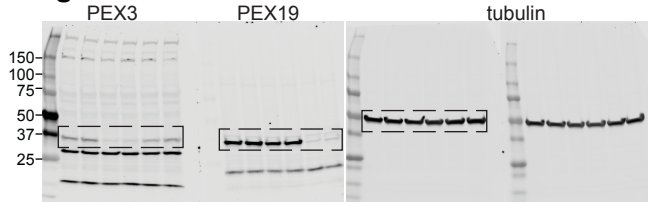

**figure 7g**

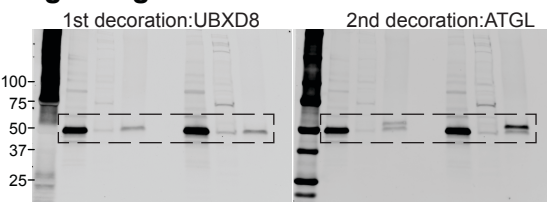

### supplementary figure 1

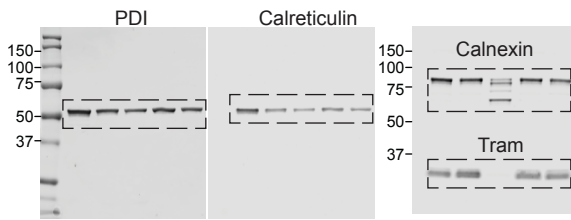

### supplementary figure 2a

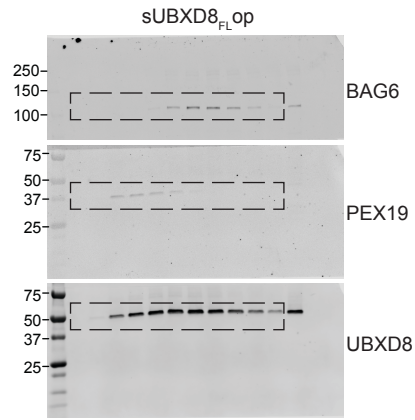

### supplementary figure 3b

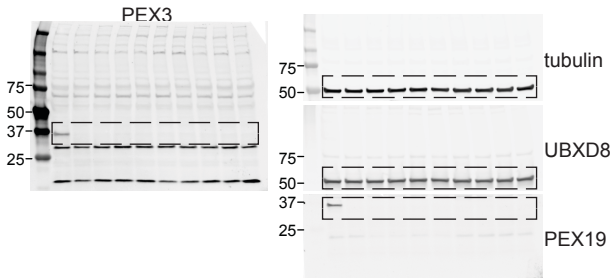

### supplementary figure 5a

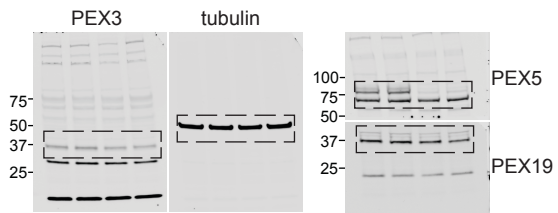

Supplement: NIHMS786950-supplement-9.pdf [file NIHMS786950-supplement-9.pdf]
